# Supplementary material for: The mechanism of oxidation in chromophore maturation of wild-type green fluorescent protein: a theoretical study
Source: Royal Society of Chemistry journal article supplement (doi:10.1039/c6cp07983k), 2017-01-01
Supplement: c6cp07983k1.pdf [file c6cp07983k1.pdf]

Electronic Supplementary Material for

**The mechanism of oxidation in chromophore maturation of wild-type green fluorescent protein: a theoretical study**

*Yingying Ma<sup>a,b,\*</sup>, Qiao Sun<sup>c</sup>, Sean C. Smith<sup>d</sup>*

*<sup>a</sup>Institute of Mining Technology, Inner Mongolia University of Technology  
Hohhot 010051, P. R. China*

*<sup>b</sup>Inner Mongolia Key Laboratory of Theoretical and Computational Chemistry  
Simulation  
Hohhot 010051, P. R. China*

*<sup>c</sup>School of Radiation Medicine and Radiation Protection,  
Soochow University,  
Suzhou 215123, P.R. China*

*<sup>d</sup>Integrated Materials Design Centre,  
School of Chemical Engineering,  
The University of New South Wales,  
NSW2052, Sydney, Australia.*

---

\*Corresponding authors.

Email: [yyma@imut.edu.cn](mailto:yyma@imut.edu.cn)

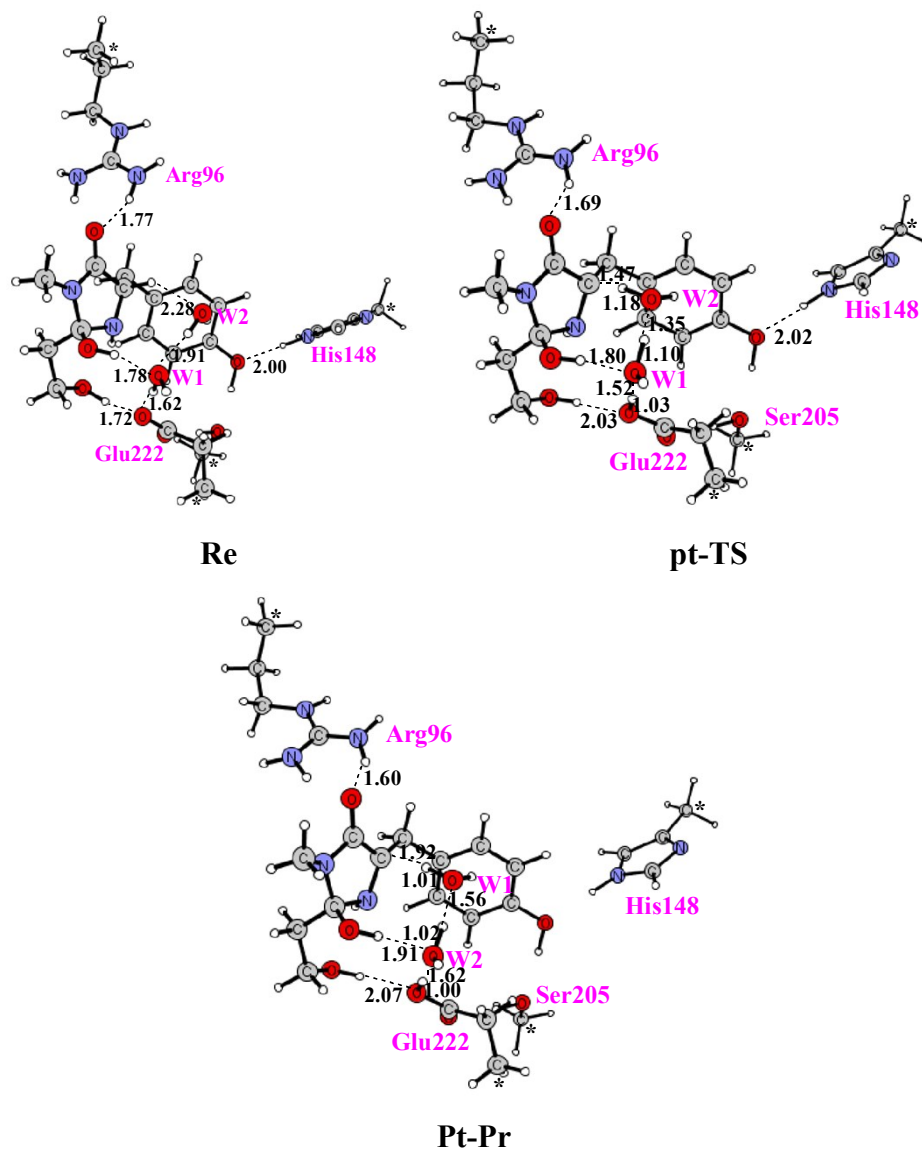

Figure S1. Optimized geometries of the reactant, transition state and product of the model system in the step of deprotonation of the Tyr66  $\alpha$ -carbon.

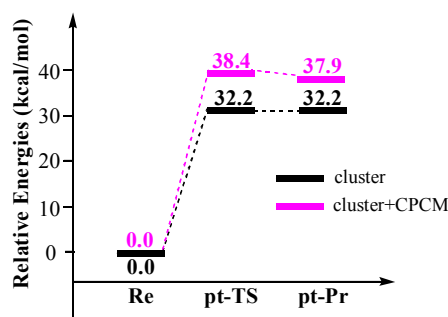

Figure S2. The potential energy profile of the model system in the step of deprotonation of the Tyr66  $\alpha$ -carbon. Digits in black are the energies of the B3LYP/6-311+G(2d,2p) level with zero-point correction, digits in red are the energies of cpcm ( $\epsilon=4$ ).

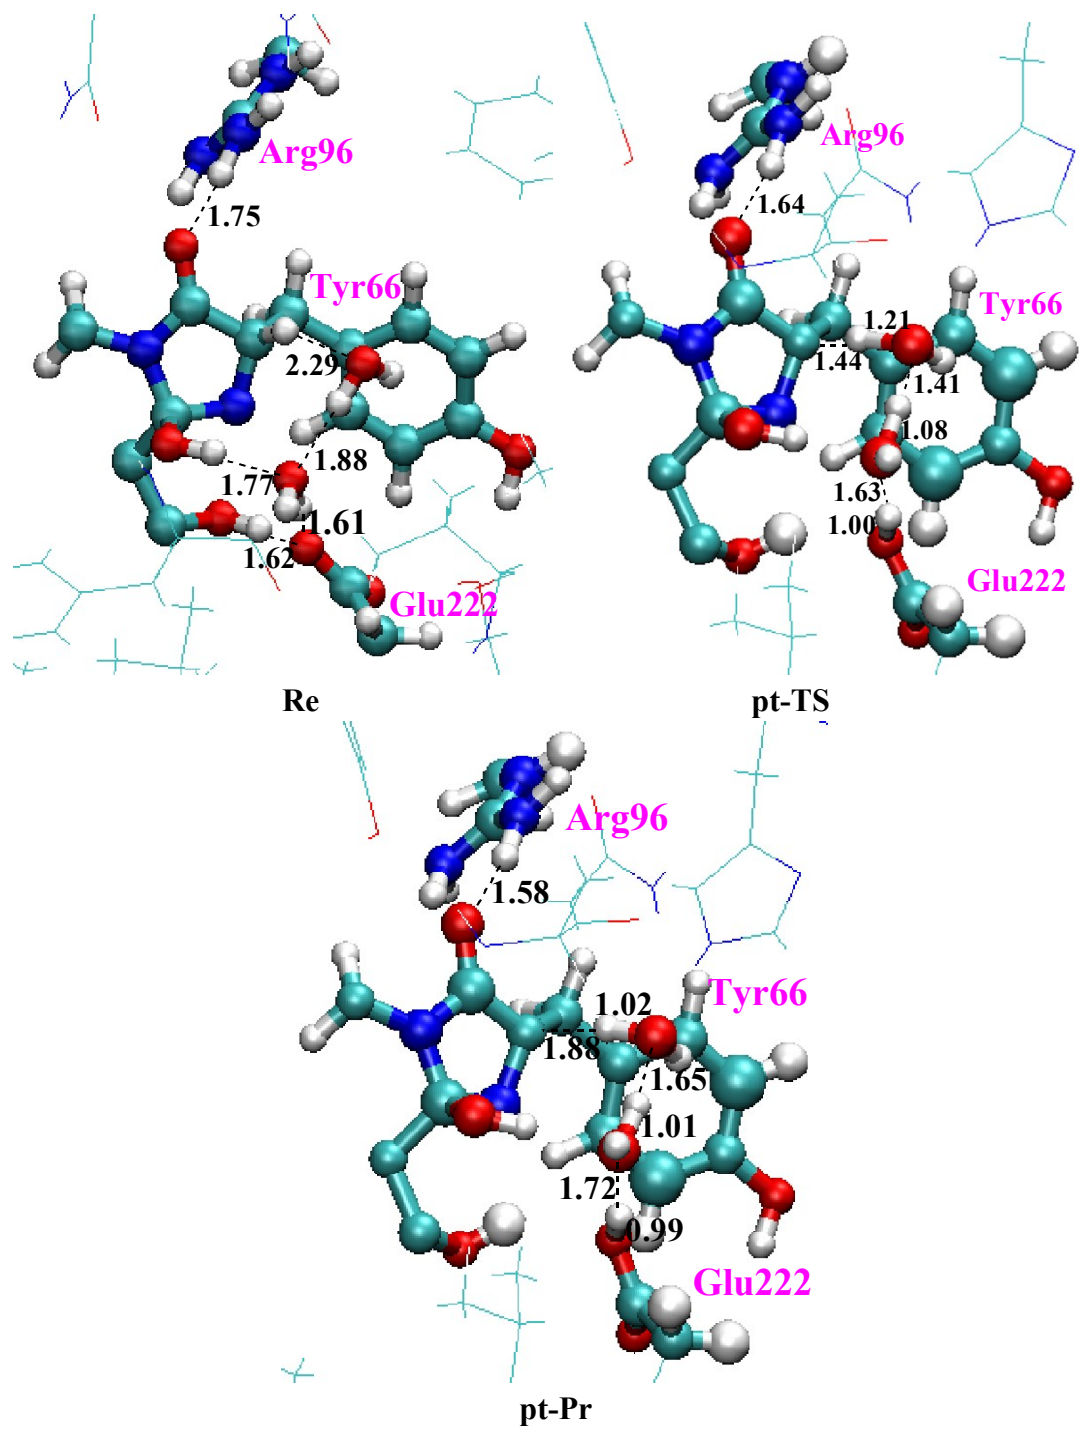

(a)

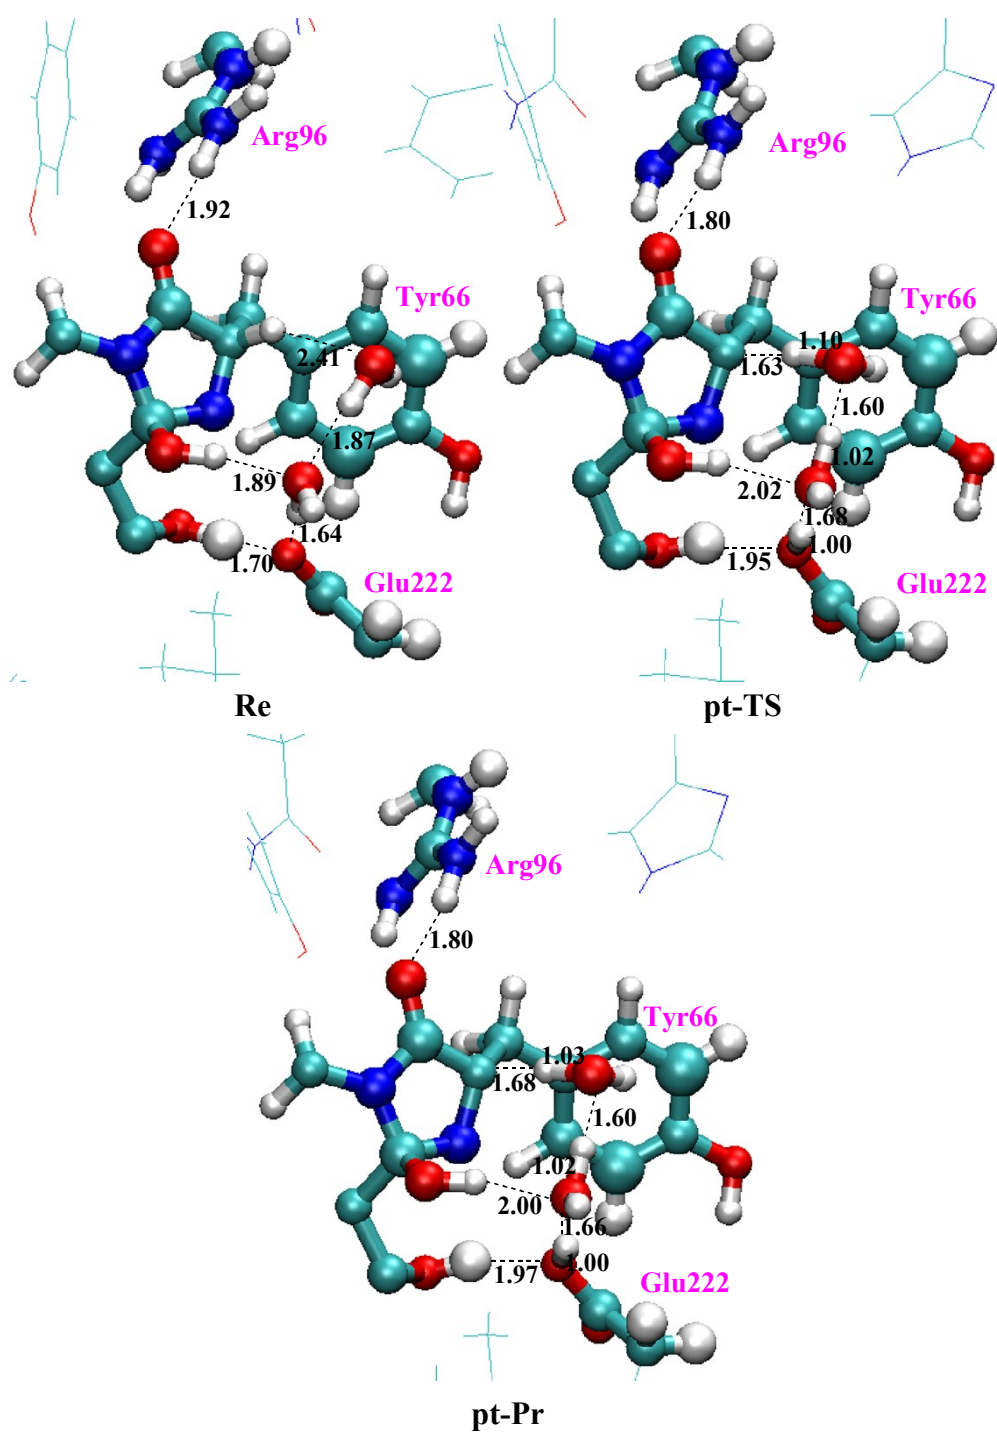

(b)

Figure S3. Optimized geometries of the reactant, transition state and product of large protein system by ONIOM-ME (a) and ONIOM-EE (b) respectively in the step of deprotonation of the Tyr66  $\alpha$ -carbon. For the sake of clarity, some atoms are omitted.

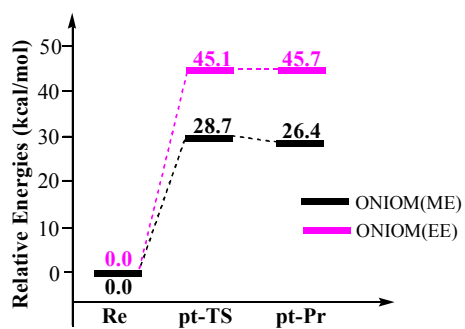

Figure S4. Potential energy profile of large protein system in the step of deprotonation of the Tyr66  $\alpha$ -carbon, energies of ONIOM(b3lyp/6-31G(d,p):Amber) corresponding to geometries optimized by mechanical embedding and electronic embedding respectively.
